# Supplementary material
Source: publisher figshare collection journal article supplement (https://acs.figshare.com/ndownloader/files/4497409)
Supplement: Supplementary file 1 [file 4497409]

  
data_cd2988 
  
_audit_creation_method            SHELXL-97 
_chemical_name_systematic 
; 
 ? 
; 
_chemical_name_common             ? 
_chemical_melting_point           ? 
_chemical_formula_moiety          ? 
_chemical_formula_sum 
 'C25 H26 Br F O4' 
_chemical_formula_weight          489.37 
  
loop_ 
 _atom_type_symbol 
 _atom_type_description 
 _atom_type_scat_dispersion_real 
 _atom_type_scat_dispersion_imag 
 _atom_type_scat_source 
 'C'  'C'   0.0033   0.0016 
 'International Tables Vol C Tables 4.2.6.8 and 6.1.1.4' 
 'H'  'H'   0.0000   0.0000 
 'International Tables Vol C Tables 4.2.6.8 and 6.1.1.4' 
 'O'  'O'   0.0106   0.0060 
 'International Tables Vol C Tables 4.2.6.8 and 6.1.1.4' 
 'F'  'F'   0.0171   0.0103 
 'International Tables Vol C Tables 4.2.6.8 and 6.1.1.4' 
 'Br'  'Br'  -0.2901   2.4595 
 'International Tables Vol C Tables 4.2.6.8 and 6.1.1.4' 
  
_symmetry_cell_setting            Monoclinic 
_symmetry_space_group_name_H-M    P2(1) 
  
loop_ 
 _symmetry_equiv_pos_as_xyz 
 'x, y, z' 
 '-x, y+1/2, -z' 
  
_cell_length_a                    8.7647(15) 
_cell_length_b                    7.3008(13) 
_cell_length_c                    18.426(3) 
_cell_angle_alpha                 90.00 
_cell_angle_beta                  90.673(3) 
_cell_angle_gamma                 90.00 
_cell_volume                      1179.0(4) 
_cell_formula_units_Z             2 
_cell_measurement_temperature     293(2) 
_cell_measurement_reflns_used     2011 
_cell_measurement_theta_min       5.124 
_cell_measurement_theta_max       42.176 
  
_exptl_crystal_description        prismatic 
_exptl_crystal_colour             colorless 
_exptl_crystal_size_max           0.386 
_exptl_crystal_size_mid           0.364 
_exptl_crystal_size_min           0.055 
_exptl_crystal_density_meas       ? 
_exptl_crystal_density_diffrn     1.378 
_exptl_crystal_density_method     'not measured' 
_exptl_crystal_F_000              504 
_exptl_absorpt_coefficient_mu     1.779 
_exptl_absorpt_correction_type    empirical 
_exptl_absorpt_correction_T_min   0.6534 
_exptl_absorpt_correction_T_max   1.0000 
_exptl_absorpt_process_details    sadabs 
  
_exptl_special_details 
; 
 ? 
; 
  
_diffrn_ambient_temperature       293(2) 
_diffrn_radiation_wavelength      0.71073 
_diffrn_radiation_type            MoK\a 
_diffrn_radiation_source          'fine-focus sealed tube' 
_diffrn_radiation_monochromator   graphite 
_diffrn_measurement_device_type   'CCD area detector' 
_diffrn_measurement_method        'phi and omega scans' 
_diffrn_detector_area_resol_mean  ? 
_diffrn_standards_number          ? 
_diffrn_standards_interval_count  ? 
_diffrn_standards_interval_time   ? 
_diffrn_standards_decay_%         ? 
_diffrn_reflns_number             6219 
_diffrn_reflns_av_R_equivalents   0.0724 
_diffrn_reflns_av_sigmaI/netI     0.0697 
_diffrn_reflns_limit_h_min        -10 
_diffrn_reflns_limit_h_max        8 
_diffrn_reflns_limit_k_min        -8 
_diffrn_reflns_limit_k_max        8 
_diffrn_reflns_limit_l_min        -22 
_diffrn_reflns_limit_l_max        21 
_diffrn_reflns_theta_min          2.21 
_diffrn_reflns_theta_max          25.48 
_reflns_number_total              3787 
_reflns_number_gt                 2338 
_reflns_threshold_expression      >2sigma(I) 
  
_computing_data_collection        'Bruker SMART' 
_computing_cell_refinement        'Bruker SMART' 
_computing_data_reduction         'Bruker SHELXTL' 
_computing_structure_solution     'SHELXS-97 (Sheldrick, 1990)' 
_computing_structure_refinement   'SHELXL-97 (Sheldrick, 1997)' 
_computing_molecular_graphics     'Bruker SHELXTL' 
_computing_publication_material   'Bruker SHELXTL' 
  
_refine_special_details 
; 
 Refinement of F^2^ against ALL reflections.  The weighted R-factor wR and 
 goodness of fit S are based on F^2^, conventional R-factors R are based 
 on F, with F set to zero for negative F^2^. The threshold expression of 
 F^2^ > 2sigma(F^2^) is used only for calculating R-factors(gt) etc. and is 
 not relevant to the choice of reflections for refinement.  R-factors based 
 on F^2^ are statistically about twice as large as those based on F, and R- 
 factors based on ALL data will be even larger. 
; 
  
_refine_ls_structure_factor_coef  Fsqd 
_refine_ls_matrix_type            full 
_refine_ls_weighting_scheme       calc 
_refine_ls_weighting_details 
 'calc w=1/[\s^2^(Fo^2^)+(0.1117P)^2^+0.0000P] where P=(Fo^2^+2Fc^2^)/3' 
_atom_sites_solution_primary      direct 
_atom_sites_solution_secondary    difmap 
_atom_sites_solution_hydrogens    geom 
_refine_ls_hydrogen_treatment     constr 
_refine_ls_extinction_method      none 
_refine_ls_extinction_coef        ? 
_refine_ls_abs_structure_details 
 'Flack H D (1983), Acta Cryst. A39, 876-881' 
_refine_ls_abs_structure_Flack    0.018(17) 
_chemical_absolute_configuration  ad 
_refine_ls_number_reflns          3787 
_refine_ls_number_parameters      284 
_refine_ls_number_restraints      1 
_refine_ls_R_factor_all           0.0915 
_refine_ls_R_factor_gt            0.0610 
_refine_ls_wR_factor_ref          0.1823 
_refine_ls_wR_factor_gt           0.1590 
_refine_ls_goodness_of_fit_ref    0.958 
_refine_ls_restrained_S_all       0.957 
_refine_ls_shift/su_max           0.018 
_refine_ls_shift/su_mean          0.003 
  
loop_ 
 _atom_site_label 
 _atom_site_type_symbol 
 _atom_site_fract_x 
 _atom_site_fract_y 
 _atom_site_fract_z 
 _atom_site_U_iso_or_equiv 
 _atom_site_adp_type 
 _atom_site_occupancy 
 _atom_site_symmetry_multiplicity 
 _atom_site_calc_flag 
 _atom_site_refinement_flags 
 _atom_site_disorder_assembly 
 _atom_site_disorder_group 
Br Br -0.50470(9) 0.27756(16) 1.06495(4) 0.1060(4) Uani 1 1 d . . . 
F1 F 0.1046(3) 0.2925(6) 0.67710(18) 0.0692(9) Uani 1 1 d . . . 
O2 O 0.3633(4) 0.4205(7) 0.8219(3) 0.0738(12) Uani 1 1 d . . . 
H2 H 0.3306 0.5238 0.8297 0.111 Uiso 1 1 calc R . . 
O3 O 0.1785(4) 0.7125(6) 0.7632(2) 0.0620(11) Uani 1 1 d . . . 
O4 O -0.0315(4) 0.5755(6) 0.7171(2) 0.0627(11) Uani 1 1 d . . . 
O1 O 0.5864(7) 0.1101(11) 0.7226(5) 0.151(3) Uani 1 1 d . . . 
C1 C 0.2009(5) 0.4116(8) 0.7144(3) 0.0537(14) Uani 1 1 d . . . 
C2 C 0.3356(6) 0.4628(9) 0.6644(4) 0.0598(16) Uani 1 1 d . . . 
H2A H 0.4059 0.5387 0.6932 0.072 Uiso 1 1 calc R . . 
C3 C 0.4202(7) 0.2826(12) 0.6473(4) 0.0837(19) Uani 1 1 d . . . 
H3A H 0.3563 0.2083 0.6156 0.100 Uiso 1 1 calc R . . 
H3B H 0.5129 0.3111 0.6214 0.100 Uiso 1 1 calc R . . 
C4 C 0.4596(8) 0.1764(11) 0.7117(6) 0.098(3) Uani 1 1 d . . . 
C5 C 0.3353(8) 0.1383(10) 0.7645(5) 0.085(2) Uani 1 1 d . . . 
H5A H 0.3782 0.0829 0.8081 0.102 Uiso 1 1 calc R . . 
H5B H 0.2625 0.0531 0.7433 0.102 Uiso 1 1 calc R . . 
C6 C 0.2532(6) 0.3194(8) 0.7844(4) 0.0640(16) Uani 1 1 d . . . 
C7 C 0.1131(6) 0.2764(11) 0.8285(4) 0.0662(14) Uani 1 1 d . . . 
H7 H 0.0385 0.2022 0.8075 0.079 Uiso 1 1 calc R . . 
C8 C 0.0904(7) 0.3376(9) 0.8948(4) 0.0700(18) Uani 1 1 d . . . 
H8 H 0.1716 0.3958 0.9181 0.084 Uiso 1 1 calc R . . 
C9 C -0.0542(7) 0.3212(9) 0.9354(4) 0.0695(18) Uani 1 1 d . . . 
C10 C -0.0561(8) 0.3463(11) 1.0072(4) 0.083(2) Uani 1 1 d . . . 
H10 H 0.0351 0.3708 1.0316 0.100 Uiso 1 1 calc R . . 
C11 C -0.1924(9) 0.3366(10) 1.0472(4) 0.085(2) Uani 1 1 d . . . 
H11 H -0.1925 0.3594 1.0968 0.102 Uiso 1 1 calc R . . 
C12 C -0.3210(7) 0.2937(13) 1.0118(3) 0.0779(18) Uani 1 1 d . . . 
C13 C -0.3253(7) 0.2646(12) 0.9382(4) 0.0764(17) Uani 1 1 d . . . 
H13 H -0.4160 0.2337 0.9145 0.092 Uiso 1 1 calc R . . 
C14 C -0.1914(7) 0.2825(16) 0.9003(3) 0.0829(18) Uani 1 1 d . . . 
H14 H -0.1932 0.2684 0.8502 0.099 Uiso 1 1 calc R . . 
C15 C 0.2909(7) 0.5721(10) 0.5991(3) 0.0638(16) Uani 1 1 d . . . 
C16 C 0.1838(9) 0.5170(15) 0.5482(5) 0.099(3) Uani 1 1 d . . . 
H16 H 0.1355 0.4047 0.5542 0.118 Uiso 1 1 calc R . . 
C17 C 0.1465(12) 0.621(2) 0.4894(4) 0.120(4) Uani 1 1 d . . . 
H17 H 0.0748 0.5780 0.4560 0.145 Uiso 1 1 calc R . . 
C18 C 0.2119(11) 0.787(2) 0.4786(4) 0.107(3) Uani 1 1 d . . . 
H18 H 0.1857 0.8589 0.4386 0.128 Uiso 1 1 calc R . . 
C19 C 0.3158(11) 0.8448(15) 0.5278(5) 0.110(3) Uani 1 1 d . . . 
H19 H 0.3634 0.9575 0.5216 0.132 Uiso 1 1 calc R . . 
C20 C 0.3525(8) 0.7390(12) 0.5872(4) 0.086(2) Uani 1 1 d . . . 
H20 H 0.4230 0.7844 0.6207 0.104 Uiso 1 1 calc R . . 
C21 C 0.1138(6) 0.5875(9) 0.7335(3) 0.0537(14) Uani 1 1 d . . . 
C22 C -0.1381(6) 0.7295(9) 0.7303(4) 0.0673(18) Uani 1 1 d . . . 
C23 C -0.1367(8) 0.7816(17) 0.8100(4) 0.102(3) Uani 1 1 d . . . 
H23A H -0.1558 0.6747 0.8389 0.153 Uiso 1 1 calc R . . 
H23B H -0.2145 0.8712 0.8186 0.153 Uiso 1 1 calc R . . 
H23C H -0.0388 0.8317 0.8229 0.153 Uiso 1 1 calc R . . 
C24 C -0.2901(8) 0.6494(13) 0.7105(7) 0.122(4) Uani 1 1 d . . . 
H24A H -0.2912 0.6159 0.6601 0.154 Uiso 1 1 calc R . . 
H24B H -0.3686 0.7382 0.7191 0.154 Uiso 1 1 calc R . . 
H24C H -0.3081 0.5426 0.7396 0.154 Uiso 1 1 calc R . . 
C25 C -0.0915(10) 0.8856(14) 0.6838(5) 0.105(3) Uani 1 1 d . . . 
H25A H -0.0069 0.9481 0.7062 0.158 Uiso 1 1 calc R . . 
H25B H -0.1755 0.9690 0.6782 0.158 Uiso 1 1 calc R . . 
H25C H -0.0621 0.8407 0.6370 0.158 Uiso 1 1 calc R . . 
  
loop_ 
 _atom_site_aniso_label 
 _atom_site_aniso_U_11 
 _atom_site_aniso_U_22 
 _atom_site_aniso_U_33 
 _atom_site_aniso_U_23 
 _atom_site_aniso_U_13 
 _atom_site_aniso_U_12 
Br 0.0951(6) 0.1124(7) 0.1115(6) 0.0107(6) 0.0342(4) 0.0034(6) 
F1 0.0470(15) 0.0680(19) 0.093(2) -0.020(2) 0.0080(14) -0.0060(18) 
O2 0.051(2) 0.072(3) 0.098(3) 0.007(3) -0.011(2) 0.003(2) 
O3 0.0435(19) 0.055(2) 0.088(3) -0.015(2) -0.0017(18) 0.0014(17) 
O4 0.0343(19) 0.061(2) 0.093(3) -0.011(2) 0.0021(17) 0.0052(18) 
O1 0.082(4) 0.129(6) 0.244(9) 0.028(6) 0.033(4) 0.068(4) 
C1 0.033(2) 0.055(3) 0.073(4) -0.012(3) 0.005(2) -0.004(2) 
C2 0.040(3) 0.058(4) 0.082(4) -0.010(3) 0.010(3) -0.002(3) 
C3 0.062(3) 0.062(3) 0.127(5) -0.014(6) 0.027(3) 0.017(4) 
C4 0.057(4) 0.068(5) 0.169(8) -0.008(5) 0.018(5) 0.030(4) 
C5 0.061(4) 0.055(4) 0.139(7) -0.007(4) 0.011(4) 0.022(3) 
C6 0.043(3) 0.056(4) 0.093(4) 0.003(3) 0.001(3) 0.001(3) 
C7 0.060(3) 0.051(3) 0.088(4) 0.011(4) 0.002(3) 0.003(4) 
C8 0.071(4) 0.064(4) 0.076(4) 0.015(4) -0.010(3) 0.001(3) 
C9 0.067(4) 0.070(5) 0.072(4) 0.011(3) 0.002(3) 0.003(3) 
C10 0.087(5) 0.090(6) 0.072(5) 0.000(4) -0.002(4) -0.001(4) 
C11 0.102(5) 0.084(6) 0.069(4) -0.003(4) 0.001(4) -0.015(4) 
C12 0.076(4) 0.081(4) 0.078(4) 0.017(5) 0.018(3) 0.003(4) 
C13 0.073(4) 0.074(5) 0.082(4) 0.003(5) 0.000(3) -0.008(4) 
C14 0.077(4) 0.106(5) 0.066(3) -0.002(6) 0.003(3) 0.002(5) 
C15 0.049(3) 0.079(5) 0.064(4) -0.020(4) 0.012(3) 0.003(3) 
C16 0.098(6) 0.115(7) 0.084(5) -0.023(5) 0.008(4) -0.022(5) 
C17 0.133(8) 0.173(13) 0.056(5) -0.006(6) -0.013(5) -0.020(8) 
C18 0.129(7) 0.127(8) 0.065(4) 0.010(7) 0.010(5) 0.021(8) 
C19 0.118(7) 0.128(9) 0.085(6) 0.008(6) 0.004(5) -0.007(6) 
C20 0.090(5) 0.094(7) 0.075(5) -0.012(5) -0.008(4) -0.008(5) 
C21 0.035(3) 0.061(4) 0.065(3) 0.004(3) 0.005(2) 0.001(3) 
C22 0.037(3) 0.067(4) 0.098(5) -0.007(4) 0.004(3) 0.017(3) 
C23 0.077(4) 0.132(7) 0.098(5) 0.000(7) 0.023(3) 0.058(6) 
C24 0.046(4) 0.094(6) 0.226(12) -0.039(7) -0.021(5) 0.014(4) 
C25 0.084(5) 0.112(7) 0.120(7) 0.025(6) 0.023(5) 0.033(5) 
  
_geom_special_details 
; 
 All esds (except the esd in the dihedral angle between two l.s. planes) 
 are estimated using the full covariance matrix.  The cell esds are taken 
 into account individually in the estimation of esds in distances, angles 
 and torsion angles; correlations between esds in cell parameters are only 
 used when they are defined by crystal symmetry.  An approximate (isotropic) 
 treatment of cell esds is used for estimating esds involving l.s. planes. 
; 
  
loop_ 
 _geom_bond_atom_site_label_1 
 _geom_bond_atom_site_label_2 
 _geom_bond_distance 
 _geom_bond_site_symmetry_2 
 _geom_bond_publ_flag 
Br C12 1.898(6) . ? 
F1 C1 1.389(6) . ? 
O2 C6 1.392(7) . ? 
O2 H2 0.8200 . ? 
O3 C21 1.202(7) . ? 
O4 C21 1.309(6) . ? 
O4 C22 1.484(7) . ? 
O1 C4 1.226(9) . ? 
C1 C6 1.521(9) . ? 
C1 C21 1.536(9) . ? 
C1 C2 1.552(8) . ? 
C2 C15 1.492(9) . ? 
C2 C3 1.544(10) . ? 
C2 H2A 0.9800 . ? 
C3 C4 1.455(12) . ? 
C3 H3A 0.9700 . ? 
C3 H3B 0.9700 . ? 
C4 C5 1.496(12) . ? 
C5 C6 1.551(9) . ? 
C5 H5A 0.9700 . ? 
C5 H5B 0.9700 . ? 
C6 C7 1.513(8) . ? 
C7 C8 1.319(10) . ? 
C7 H7 0.9300 . ? 
C8 C9 1.483(9) . ? 
C8 H8 0.9300 . ? 
C9 C10 1.336(10) . ? 
C9 C14 1.388(9) . ? 
C10 C11 1.413(10) . ? 
C10 H10 0.9300 . ? 
C11 C12 1.333(10) . ? 
C11 H11 0.9300 . ? 
C12 C13 1.372(9) . ? 
C13 C14 1.378(8) . ? 
C13 H13 0.9300 . ? 
C14 H14 0.9300 . ? 
C15 C20 1.352(11) . ? 
C15 C16 1.380(10) . ? 
C16 C17 1.360(14) . ? 
C16 H16 0.9300 . ? 
C17 C18 1.356(16) . ? 
C17 H17 0.9300 . ? 
C18 C19 1.345(13) . ? 
C18 H18 0.9300 . ? 
C19 C20 1.374(12) . ? 
C19 H19 0.9300 . ? 
C20 H20 0.9300 . ? 
C22 C25 1.486(11) . ? 
C22 C24 1.496(10) . ? 
C22 C23 1.517(10) . ? 
C23 H23A 0.9600 . ? 
C23 H23B 0.9600 . ? 
C23 H23C 0.9600 . ? 
C24 H24A 0.9600 . ? 
C24 H24B 0.9600 . ? 
C24 H24C 0.9600 . ? 
C25 H25A 0.9600 . ? 
C25 H25B 0.9600 . ? 
C25 H25C 0.9600 . ? 
  
loop_ 
 _geom_angle_atom_site_label_1 
 _geom_angle_atom_site_label_2 
 _geom_angle_atom_site_label_3 
 _geom_angle 
 _geom_angle_site_symmetry_1 
 _geom_angle_site_symmetry_3 
 _geom_angle_publ_flag 
C6 O2 H2 109.5 . . ? 
C21 O4 C22 121.7(5) . . ? 
F1 C1 C6 108.5(5) . . ? 
F1 C1 C21 109.6(4) . . ? 
C6 C1 C21 108.8(5) . . ? 
F1 C1 C2 108.6(4) . . ? 
C6 C1 C2 112.8(4) . . ? 
C21 C1 C2 108.5(5) . . ? 
C15 C2 C3 114.5(5) . . ? 
C15 C2 C1 114.4(5) . . ? 
C3 C2 C1 106.6(5) . . ? 
C15 C2 H2A 107.0 . . ? 
C3 C2 H2A 107.0 . . ? 
C1 C2 H2A 107.0 . . ? 
C4 C3 C2 113.5(6) . . ? 
C4 C3 H3A 108.9 . . ? 
C2 C3 H3A 108.9 . . ? 
C4 C3 H3B 108.9 . . ? 
C2 C3 H3B 108.9 . . ? 
H3A C3 H3B 107.7 . . ? 
O1 C4 C3 123.4(8) . . ? 
O1 C4 C5 119.0(10) . . ? 
C3 C4 C5 117.5(6) . . ? 
C4 C5 C6 109.8(6) . . ? 
C4 C5 H5A 109.7 . . ? 
C6 C5 H5A 109.7 . . ? 
C4 C5 H5B 109.7 . . ? 
C6 C5 H5B 109.7 . . ? 
H5A C5 H5B 108.2 . . ? 
O2 C6 C7 114.0(6) . . ? 
O2 C6 C1 112.7(5) . . ? 
C7 C6 C1 108.0(4) . . ? 
O2 C6 C5 104.4(5) . . ? 
C7 C6 C5 109.4(5) . . ? 
C1 C6 C5 108.3(6) . . ? 
C8 C7 C6 124.0(6) . . ? 
C8 C7 H7 118.0 . . ? 
C6 C7 H7 118.0 . . ? 
C7 C8 C9 125.4(6) . . ? 
C7 C8 H8 117.3 . . ? 
C9 C8 H8 117.3 . . ? 
C10 C9 C14 117.9(6) . . ? 
C10 C9 C8 120.6(6) . . ? 
C14 C9 C8 121.5(6) . . ? 
C9 C10 C11 122.0(6) . . ? 
C9 C10 H10 119.0 . . ? 
C11 C10 H10 119.0 . . ? 
C12 C11 C10 118.2(7) . . ? 
C12 C11 H11 120.9 . . ? 
C10 C11 H11 120.9 . . ? 
C11 C12 C13 122.2(6) . . ? 
C11 C12 Br 118.6(5) . . ? 
C13 C12 Br 119.1(5) . . ? 
C12 C13 C14 118.2(6) . . ? 
C12 C13 H13 120.9 . . ? 
C14 C13 H13 120.9 . . ? 
C13 C14 C9 121.5(6) . . ? 
C13 C14 H14 119.3 . . ? 
C9 C14 H14 119.3 . . ? 
C20 C15 C16 115.0(8) . . ? 
C20 C15 C2 120.7(6) . . ? 
C16 C15 C2 124.3(7) . . ? 
C17 C16 C15 122.2(10) . . ? 
C17 C16 H16 118.9 . . ? 
C15 C16 H16 118.9 . . ? 
C18 C17 C16 121.3(9) . . ? 
C18 C17 H17 119.4 . . ? 
C16 C17 H17 119.4 . . ? 
C19 C18 C17 117.7(9) . . ? 
C19 C18 H18 121.2 . . ? 
C17 C18 H18 121.2 . . ? 
C18 C19 C20 120.7(10) . . ? 
C18 C19 H19 119.6 . . ? 
C20 C19 H19 119.6 . . ? 
C15 C20 C19 123.1(7) . . ? 
C15 C20 H20 118.5 . . ? 
C19 C20 H20 118.5 . . ? 
O3 C21 O4 127.4(6) . . ? 
O3 C21 C1 120.3(4) . . ? 
O4 C21 C1 112.1(5) . . ? 
O4 C22 C25 108.0(5) . . ? 
O4 C22 C24 103.0(6) . . ? 
C25 C22 C24 114.2(7) . . ? 
O4 C22 C23 110.5(5) . . ? 
C25 C22 C23 111.5(7) . . ? 
C24 C22 C23 109.3(7) . . ? 
C22 C23 H23A 109.5 . . ? 
C22 C23 H23B 109.5 . . ? 
H23A C23 H23B 109.5 . . ? 
C22 C23 H23C 109.5 . . ? 
H23A C23 H23C 109.5 . . ? 
H23B C23 H23C 109.5 . . ? 
C22 C24 H24A 109.5 . . ? 
C22 C24 H24B 109.5 . . ? 
H24A C24 H24B 109.5 . . ? 
C22 C24 H24C 109.5 . . ? 
H24A C24 H24C 109.5 . . ? 
H24B C24 H24C 109.5 . . ? 
C22 C25 H25A 109.5 . . ? 
C22 C25 H25B 109.5 . . ? 
H25A C25 H25B 109.5 . . ? 
C22 C25 H25C 109.5 . . ? 
H25A C25 H25C 109.5 . . ? 
H25B C25 H25C 109.5 . . ? 
  
loop_ 
 _geom_torsion_atom_site_label_1 
 _geom_torsion_atom_site_label_2 
 _geom_torsion_atom_site_label_3 
 _geom_torsion_atom_site_label_4 
 _geom_torsion 
 _geom_torsion_site_symmetry_1 
 _geom_torsion_site_symmetry_2 
 _geom_torsion_site_symmetry_3 
 _geom_torsion_site_symmetry_4 
 _geom_torsion_publ_flag 
F1 C1 C2 C15 66.2(6) . . . . ? 
C6 C1 C2 C15 -173.5(5) . . . . ? 
C21 C1 C2 C15 -52.9(6) . . . . ? 
F1 C1 C2 C3 -61.4(6) . . . . ? 
C6 C1 C2 C3 58.9(6) . . . . ? 
C21 C1 C2 C3 179.5(5) . . . . ? 
C15 C2 C3 C4 -178.7(6) . . . . ? 
C1 C2 C3 C4 -51.2(7) . . . . ? 
C2 C3 C4 O1 -132.7(8) . . . . ? 
C2 C3 C4 C5 50.9(9) . . . . ? 
O1 C4 C5 C6 132.5(8) . . . . ? 
C3 C4 C5 C6 -51.1(10) . . . . ? 
F1 C1 C6 O2 173.5(4) . . . . ? 
C21 C1 C6 O2 -67.3(6) . . . . ? 
C2 C1 C6 O2 53.2(6) . . . . ? 
F1 C1 C6 C7 -59.7(6) . . . . ? 
C21 C1 C6 C7 59.5(6) . . . . ? 
C2 C1 C6 C7 179.9(5) . . . . ? 
F1 C1 C6 C5 58.6(5) . . . . ? 
C21 C1 C6 C5 177.8(5) . . . . ? 
C2 C1 C6 C5 -61.7(6) . . . . ? 
C4 C5 C6 O2 -66.3(8) . . . . ? 
C4 C5 C6 C7 171.4(7) . . . . ? 
C4 C5 C6 C1 53.9(8) . . . . ? 
O2 C6 C7 C8 4.2(9) . . . . ? 
C1 C6 C7 C8 -121.8(7) . . . . ? 
C5 C6 C7 C8 120.6(8) . . . . ? 
C6 C7 C8 C9 170.5(6) . . . . ? 
C7 C8 C9 C10 163.7(7) . . . . ? 
C7 C8 C9 C14 -17.4(11) . . . . ? 
C14 C9 C10 C11 -0.8(12) . . . . ? 
C8 C9 C10 C11 178.2(7) . . . . ? 
C9 C10 C11 C12 2.7(12) . . . . ? 
C10 C11 C12 C13 -2.0(13) . . . . ? 
C10 C11 C12 Br 179.3(6) . . . . ? 
C11 C12 C13 C14 -0.6(14) . . . . ? 
Br C12 C13 C14 178.1(8) . . . . ? 
C12 C13 C14 C9 2.7(15) . . . . ? 
C10 C9 C14 C13 -2.0(14) . . . . ? 
C8 C9 C14 C13 179.0(8) . . . . ? 
C3 C2 C15 C20 -114.9(7) . . . . ? 
C1 C2 C15 C20 121.6(7) . . . . ? 
C3 C2 C15 C16 66.8(8) . . . . ? 
C1 C2 C15 C16 -56.6(8) . . . . ? 
C20 C15 C16 C17 1.6(12) . . . . ? 
C2 C15 C16 C17 180.0(8) . . . . ? 
C15 C16 C17 C18 -1.0(15) . . . . ? 
C16 C17 C18 C19 0.4(15) . . . . ? 
C17 C18 C19 C20 -0.7(14) . . . . ? 
C16 C15 C20 C19 -1.9(11) . . . . ? 
C2 C15 C20 C19 179.7(7) . . . . ? 
C18 C19 C20 C15 1.5(13) . . . . ? 
C22 O4 C21 O3 4.0(9) . . . . ? 
C22 O4 C21 C1 -179.6(5) . . . . ? 
F1 C1 C21 O3 -176.7(5) . . . . ? 
C6 C1 C21 O3 64.8(7) . . . . ? 
C2 C1 C21 O3 -58.2(7) . . . . ? 
F1 C1 C21 O4 6.6(6) . . . . ? 
C6 C1 C21 O4 -111.9(5) . . . . ? 
C2 C1 C21 O4 125.1(5) . . . . ? 
C21 O4 C22 C25 64.0(8) . . . . ? 
C21 O4 C22 C24 -174.8(7) . . . . ? 
C21 O4 C22 C23 -58.2(8) . . . . ? 
  
loop_ 
 _geom_hbond_atom_site_label_D 
 _geom_hbond_atom_site_label_H 
 _geom_hbond_atom_site_label_A 
 _geom_hbond_distance_DH 
 _geom_hbond_distance_HA 
 _geom_hbond_distance_DA 
 _geom_hbond_angle_DHA 
 _geom_hbond_site_symmetry_A 
O2 H2 Br  0.82 3.08 3.552(5) 119.6 2_557 
O2 H2 O3  0.82 2.27 2.880(6) 131.9 . 
  
_diffrn_measured_fraction_theta_max    0.995 
_diffrn_reflns_theta_full              25.48 
_diffrn_measured_fraction_theta_full   0.995 
_refine_diff_density_max    0.483 
_refine_diff_density_min   -0.429 
_refine_diff_density_rms    0.069 
  
